# Supplementary material for: Comprehensive characterization of N- and O- glycosylation of SARS-CoV-2 human receptor angiotensin converting enzyme 2
Source: bioRxiv or medRxiv preprint supplement (doi:10.1101/2020.05.01.071688), 2020-08-14
Supplement: Supplementary file [file media-1.pdf]

## Supplementary Information

### Comprehensive characterization of N- and O- glycosylation of SARS-CoV-2 human receptor angiotensin converting enzyme 2.

Asif Shajahan, Stephanie Archer-Hartmann, Nitin T. Supekar, Anne S. Gleinich, Christian Heiss, and Parastoo Azadi\*.

Complex Carbohydrate Research Center, The University of Georgia, Athens, GA 30602

\*Corresponding Author:

Parastoo Azadi, Ph.D.

Analytical Service and Training Laboratory

Complex Carbohydrate Research Center,

University of Georgia,

315 Riverbend Road, Athens, GA 30602

Keywords: COVID-19 receptor, ACE2 glycosylation, SARS-CoV-2 receptor, ACE2 site mapping, hACE2 N-glycosylation.

#### Table of Contents

| Description                                                                                                          | Page No. |
|----------------------------------------------------------------------------------------------------------------------|----------|
| Supp. Figure S1: Spectrum of intact N-glycopeptide with assigned N-glycans at 53                                     | S2       |
| Supp. Figure S2: Spectrum of intact N-glycopeptide with assigned N-glycans at 90                                     | S2       |
| Supp. Figure S3: Spectrum of intact N-glycopeptide with assigned N-glycans at 103                                    | S3       |
| Supp. Figure S4: Spectrum of intact N-glycopeptide with assigned N-glycans at N322                                   | S3       |
| Supp. Figure S5: Spectrum of intact N-glycopeptide with assigned N-glycans at N432                                   | S4       |
| Supp. Figure S6: Spectrum of intact N-glycopeptide with assigned N-glycans at N546                                   | S4       |
| Supp. Figure S7: Spectrum of intact N-glycopeptide with assigned N-glycans at N690                                   | S5       |
| Supp. Figure S8: Spectrum of intact O-glycopeptide with assigned O-glycans at O155                                   | S5       |
| Supp. Figure S9: Spectrum of intact O-glycopeptide with assigned O-glycans at O496                                   | S6       |
| Supp. Figure S10: MALDI-MS spectrum showing the permethylated N-glycans released from hACE2 by PNGase F.             | S7       |
| Supp. Figure S11: MALDI-MS spectrum showing the permethylated O-glycans released from hACE2 by $\beta$ -elimination. | S7       |

## Glycopeptide Analysis:

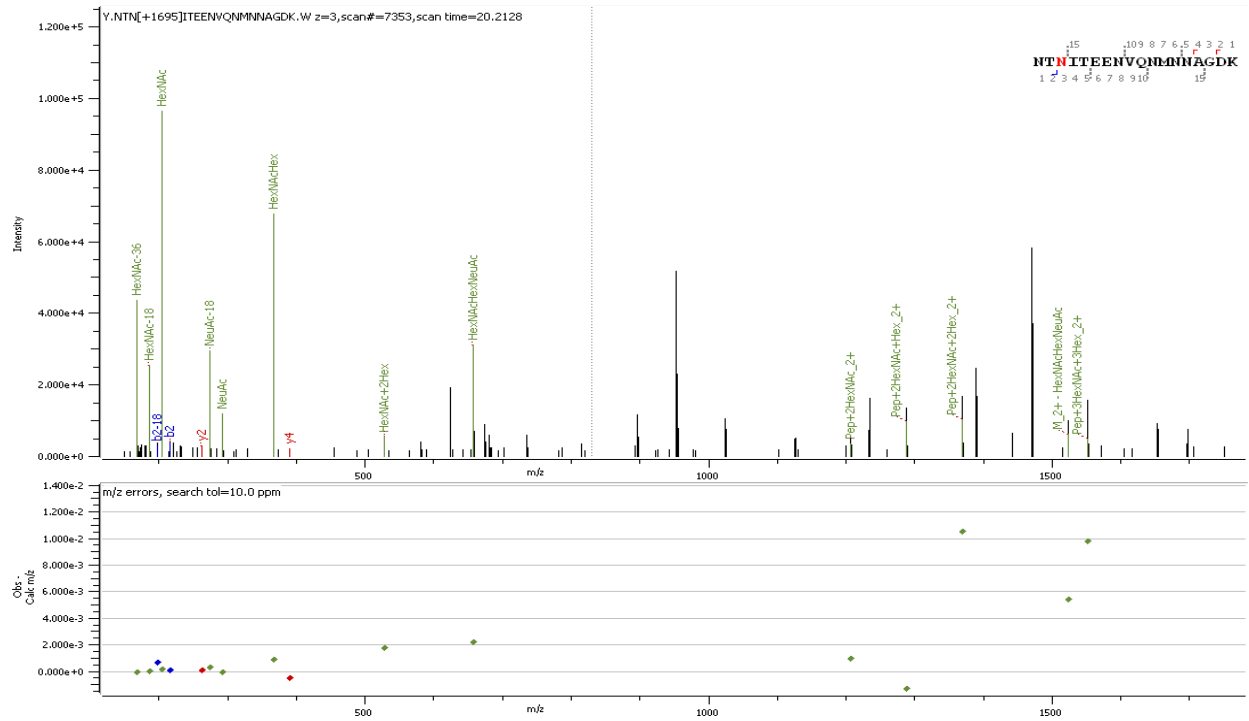

**Supp. Figure S1:** Representative HCD MS/MS spectrum of intact N-glycopeptide with assigned N-glycan (GlcNAc<sub>2</sub>Fuc<sub>1</sub>Man<sub>3</sub>GlcNAc<sub>1</sub>Gal<sub>1</sub>NeuAc<sub>1</sub>) at N53

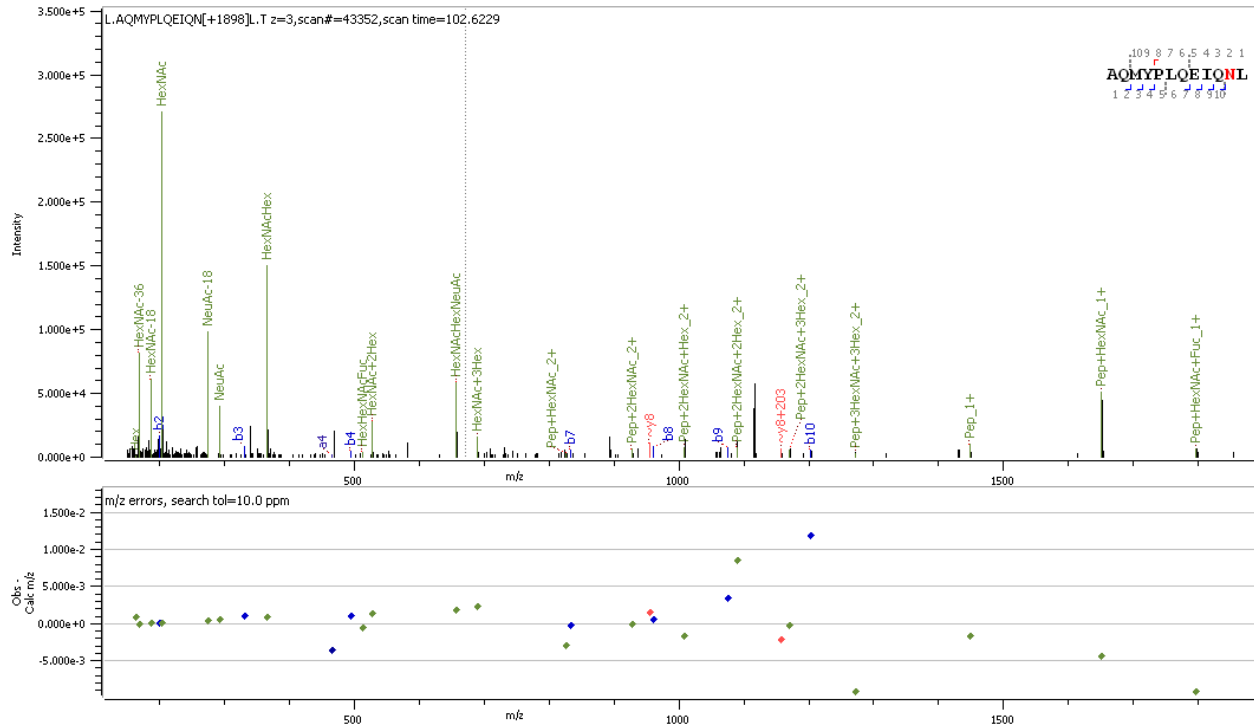

**Supp. Figure S2:** Representative HCD MS/MS spectrum of intact N-glycopeptide with assigned N-glycan (GlcNAc<sub>2</sub>Fuc<sub>1</sub>Man<sub>3</sub>GlcNAc<sub>2</sub>Gal<sub>1</sub>NeuAc<sub>1</sub>) at N90

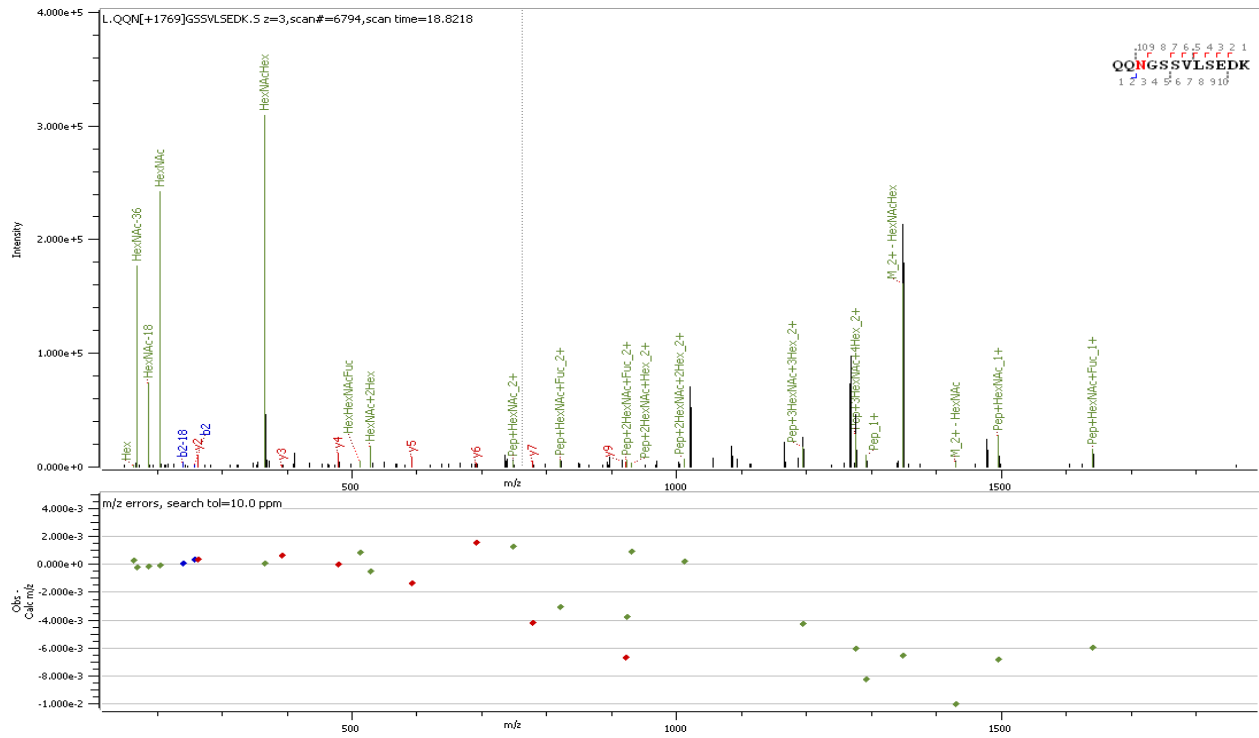

**Supp. Figure S3:** Representative HCD MS/MS spectrum of intact N-glycopeptide with assigned N-glycan (GlcNAc<sub>2</sub>Fuc<sub>1</sub>Man<sub>3</sub>GlcNAc<sub>2</sub>Gal<sub>2</sub>) at N103

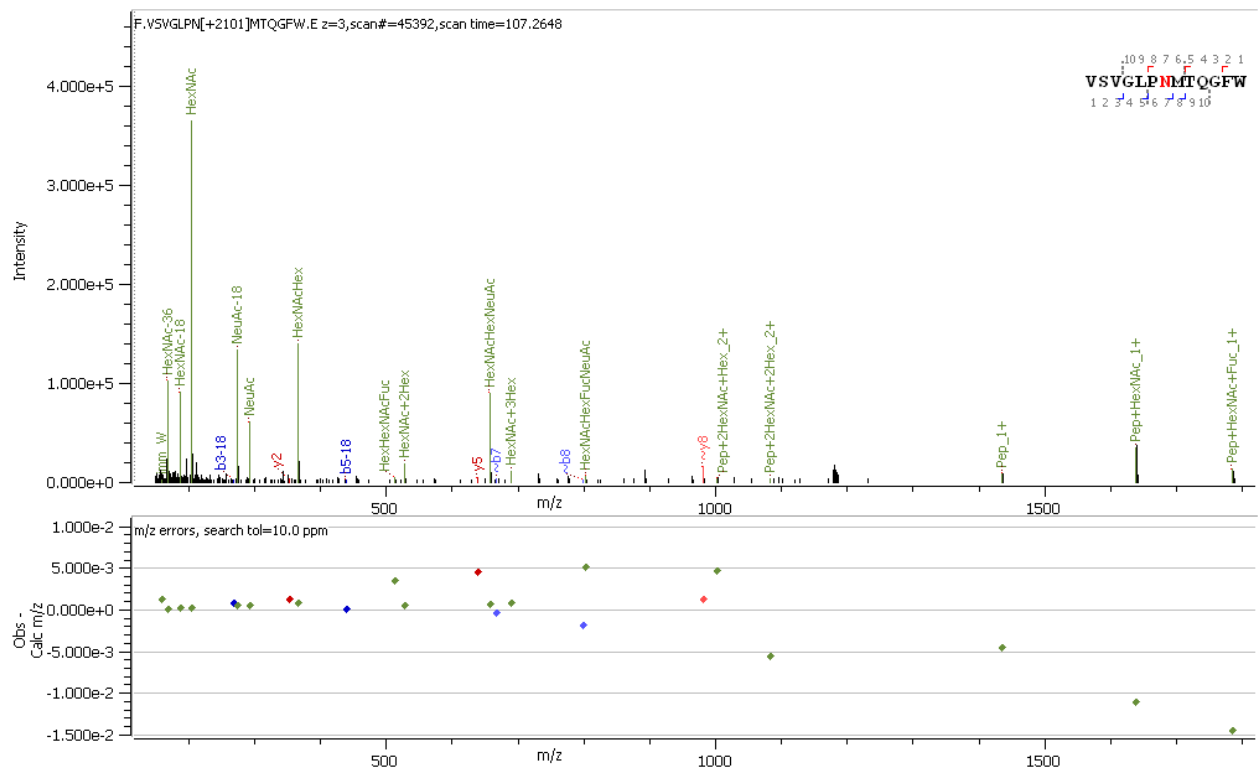

**Supp. Figure S4:** Representative HCD MS/MS spectrum of intact N-glycopeptide with assigned N-glycan (GlcNAc<sub>2</sub>Fuc<sub>1</sub>Man<sub>3</sub>GlcNAc<sub>3</sub>Gal<sub>1</sub>NeuAc<sub>1</sub>) at N322

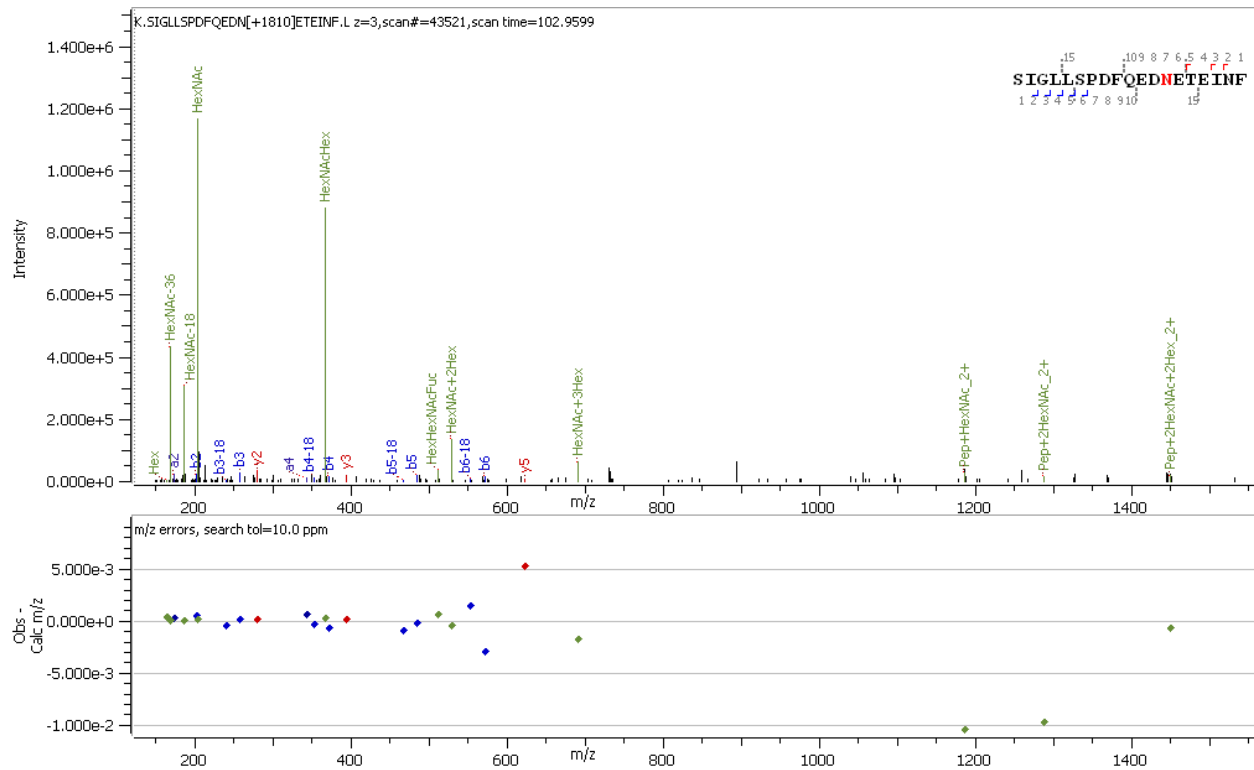

**Supp. Figure S5:** Representative HCD MS/MS spectrum of intact N-glycopeptide with assigned N-glycan (GlcNAc<sub>2</sub>Fuc<sub>1</sub>Man<sub>3</sub>GlcNAc<sub>3</sub>Gal<sub>1</sub>) at N432

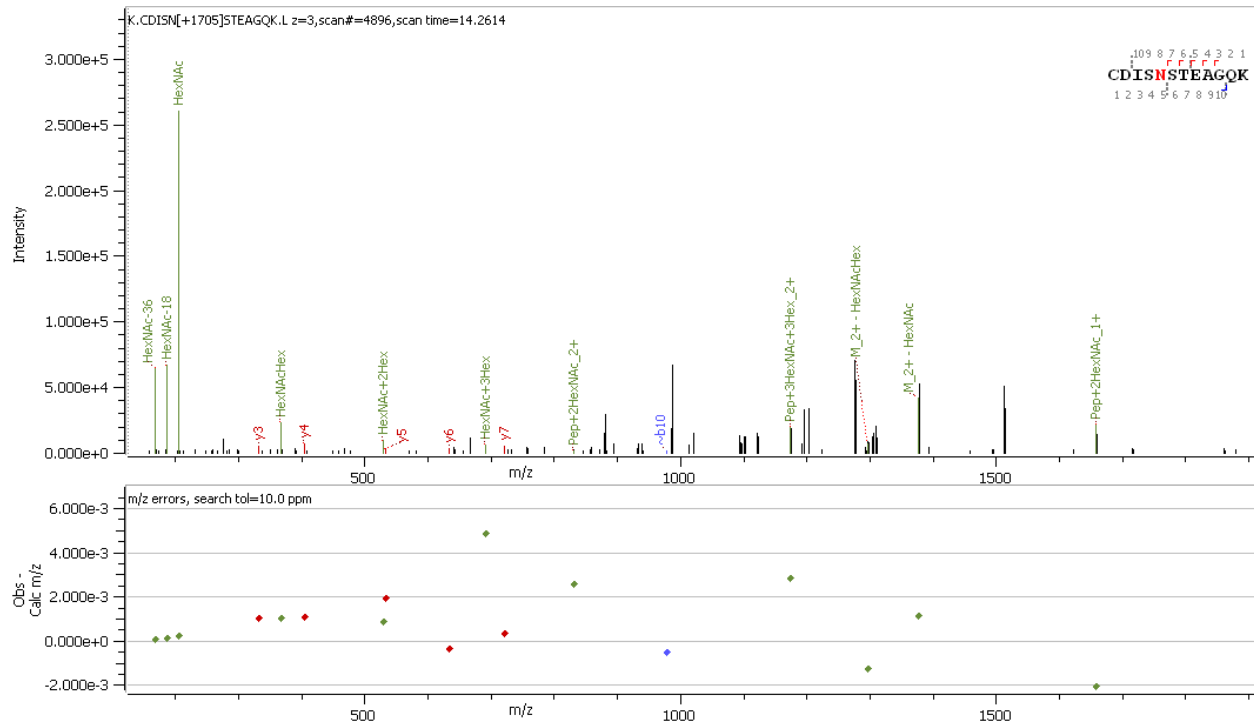

**Supp. Figure S6:** Representative HCD MS/MS spectrum of intact N-glycopeptide with assigned N-glycan (GlcNAc<sub>2</sub>Man<sub>3</sub>GlcNAc<sub>4</sub>) at N546

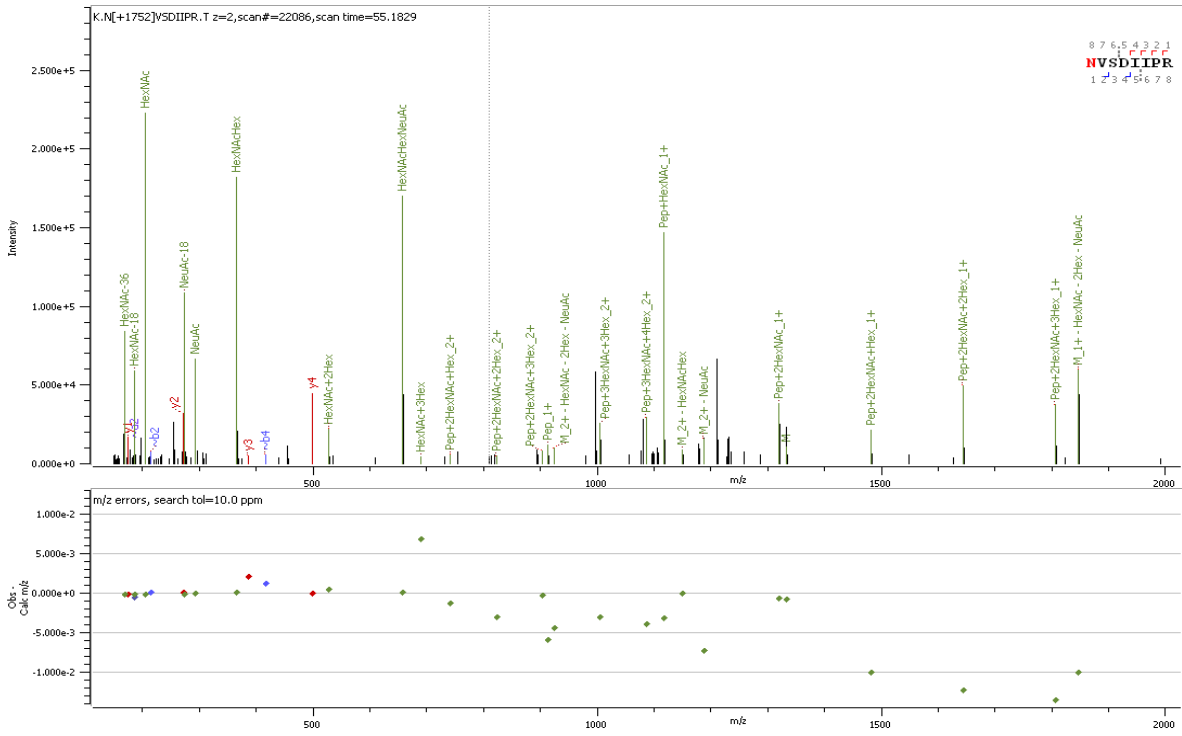

**Supp. Figure S7:** Representative HCD MS/MS spectrum of intact N-glycopeptide with assigned N-glycan (GlcNAc<sub>2</sub>Man<sub>3</sub>GlcNAc<sub>2</sub>Gal<sub>1</sub>NeuAc<sub>1</sub>) at N690

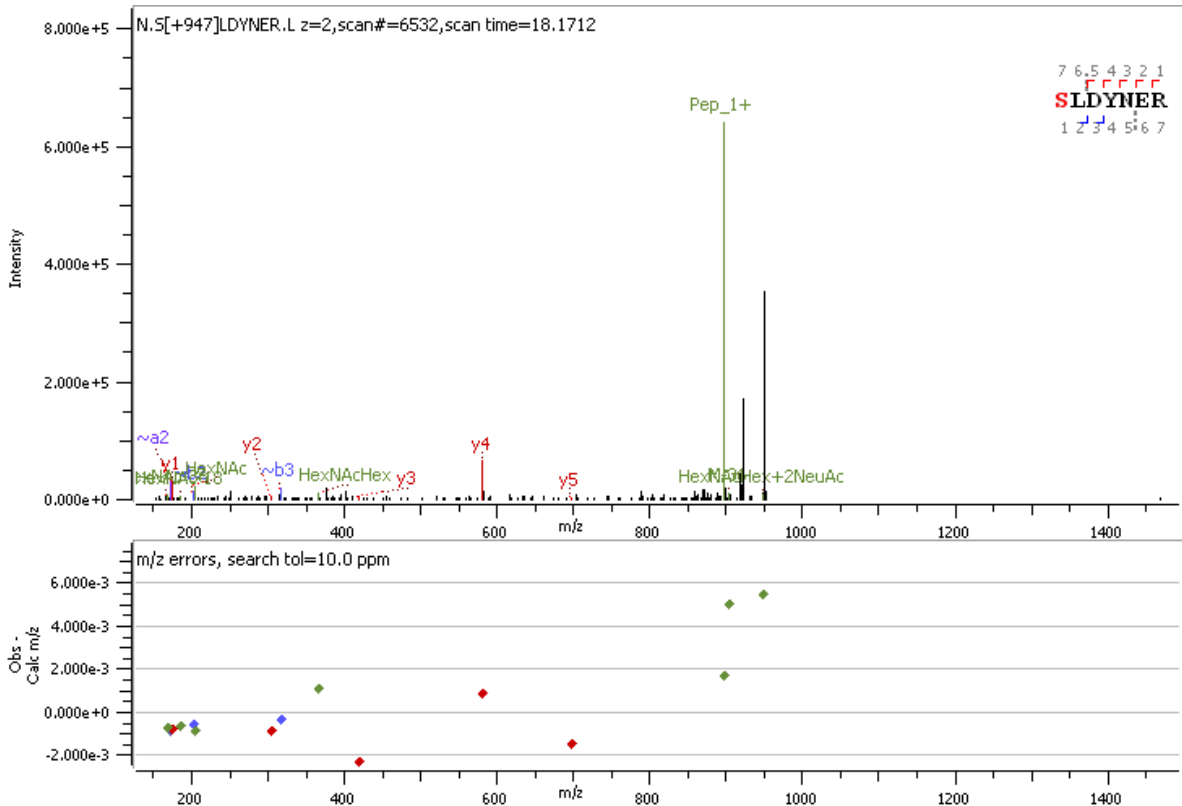

**Supp. Figure S8:** Representative HCD MS/MS spectrum of intact O-glycopeptide with assigned O-glycan (GalNAcGalNeuAc<sub>2</sub>) at O155.

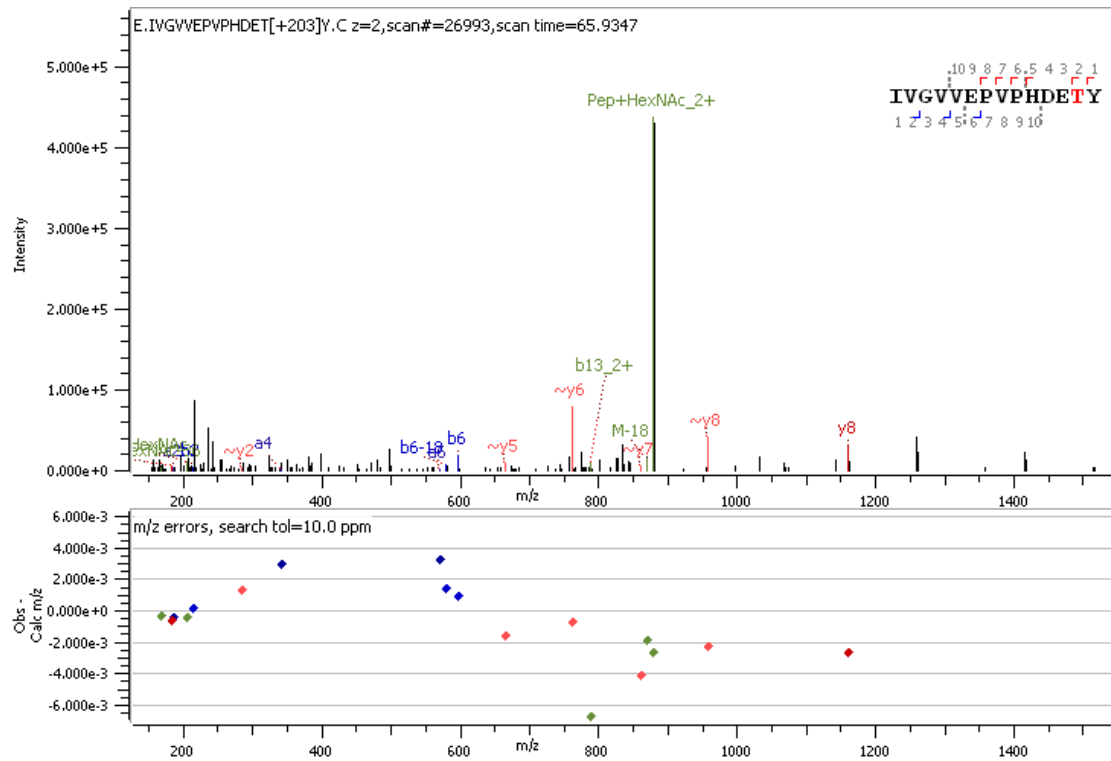

**Supp. Figure S9:** Representative HCD MS/MS spectrum of intact O-glycopeptide with assigned O-glycan (HexNAc) at O496.

## Glycomics Analysis:

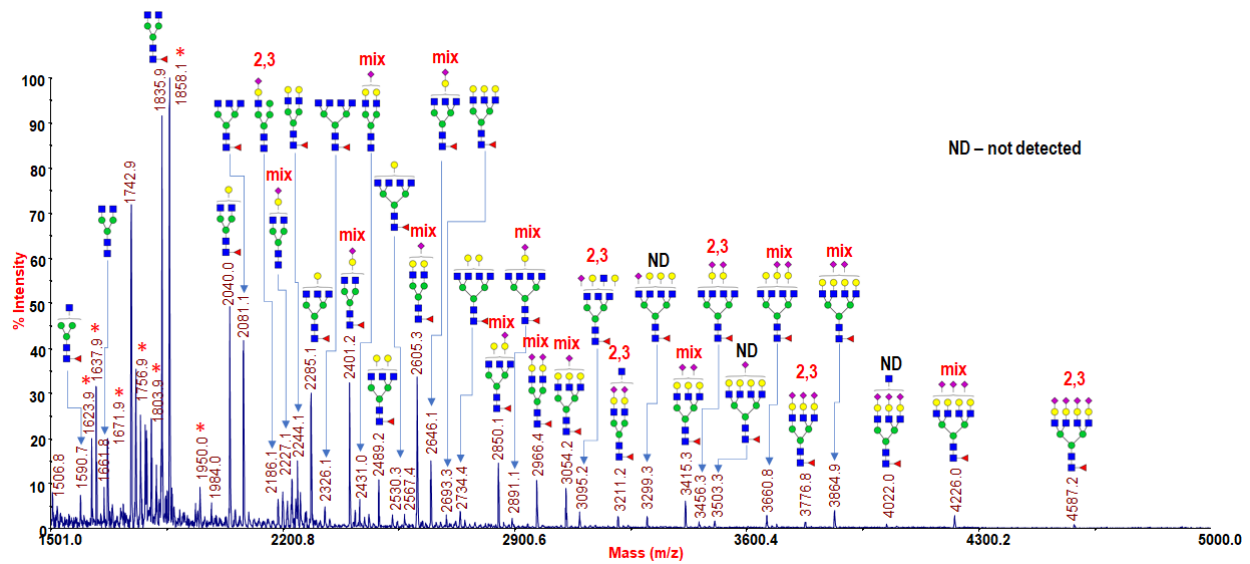

**Supp. Figure S10:** MALDI-MS spectrum showing the permethylated N-glycans released from hACE2 by PNGase F along with sialic acid linkages (determined by ESI-MS<sup>n</sup>).

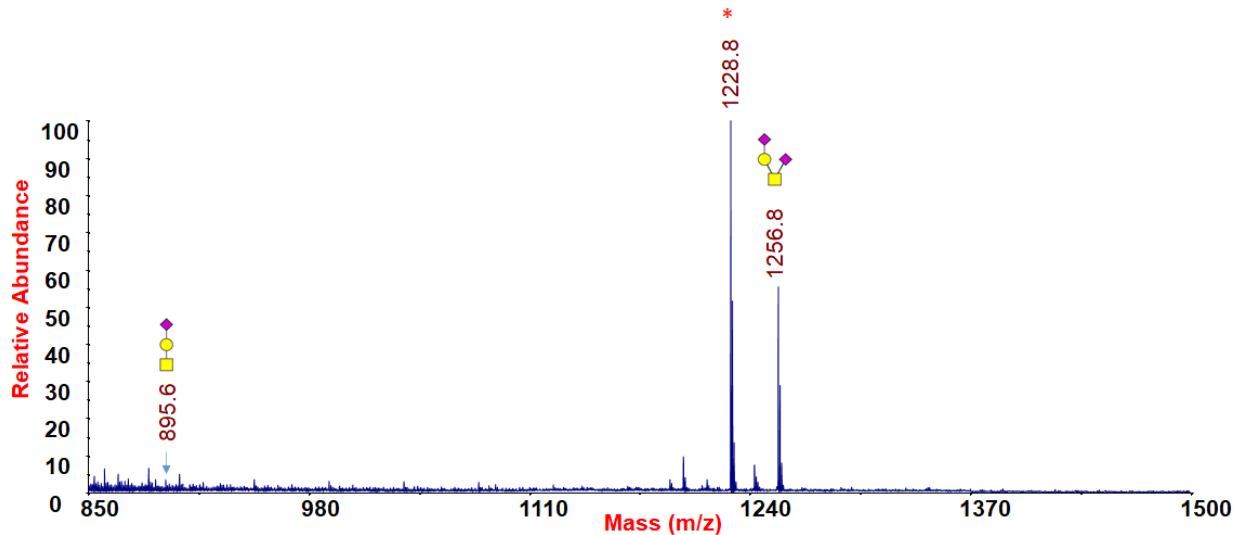

**Supp. Figure S11:** MALDI-MS spectrum showing the permethylated O-glycans released from hACE2 by  $\beta$ -elimination.
